# Supplementary material for: Deprivation Index and Lifestyle: Baseline Cross-Sectional Analysis of the PREDIMED-Plus Catalonia Study
Source: MDPI journal article supplement (doi:10.3390/nu13103408), 2021-09-27
Supplement: s1 [file s1]

**Table S1. Food groups**

| <b>Food group</b>                                                | <b>Items</b>                                                                                                                                                                                                                                             |
|------------------------------------------------------------------|----------------------------------------------------------------------------------------------------------------------------------------------------------------------------------------------------------------------------------------------------------|
| Full-fat dairy                                                   | <i>Whole milk, yoghurt (whole), petite-suisse, cottage cheese and curd, semicured/cured cheeses fresh cheese, milkshakes, custard, flan and pudding, ice cream.</i>                                                                                      |
| Low-fat dairy                                                    | <i>Semi-skimmed milk, non-fat milk, skimmed yoghurt</i>                                                                                                                                                                                                  |
| White meat                                                       | <i>Chicken or turkey with skin, chicken or turkey without skin, rabbit</i>                                                                                                                                                                               |
| Red meat and meat products                                       | <i>Beef or veal meat, pork meat, lamb meat, liver, entrails, cured ham, boiled ham, blood sausage, pâté, hamburgers, bacon</i>                                                                                                                           |
| Eggs                                                             | <i>Egg</i>                                                                                                                                                                                                                                               |
| Fish and seafood                                                 | <i>White fish, blue fish, salad fish, oysters, clams and mussels, squid, octopus, prawn, king prawn, crayfish, fatty fish canned in oil; fatty fish canned in salted water.</i>                                                                          |
| Refined cereals                                                  | <i>White bread, breakfast cereals, white rice, pasta (spaghetti, macaroni, noodles, others), pizzas</i>                                                                                                                                                  |
| Whole-grain cereals                                              | <i>Whole-grain bread, whole-grain cereals, muesli, oat grains, all bran, brown rice, whole-wheat pasta, whole-grain and fiber biscuits.</i>                                                                                                              |
| Legumes                                                          | <i>Lentils, chickpeas, beans and peas</i>                                                                                                                                                                                                                |
| Fruits                                                           | <i>Oranges, tangerines, grapefruits, bananas, apples and pears, strawberries, cherries and plums, watermelon, melon, kiwi, grapes, raisins</i>                                                                                                           |
| Vegetables                                                       | <i>Swiss chards and spinach, cabbage, cauliflower, broccoli, lettuce, endive, tomato, carrot and pumpkin green bean, zucchini, aubergines and cucumbers, peppers, asparagus, “gazpacho”, onions, garlic, mushrooms and champignons, other vegetables</i> |
| Nuts                                                             | <i>Almonds, pistachios, hazelnuts and other nuts</i>                                                                                                                                                                                                     |
| Olive oil and olives                                             | <i>Olives, refined olive oil, extra virgin olive oil</i>                                                                                                                                                                                                 |
| Other fat or oils, full-fat dairy derivatives and processed meal | <i>Olive pomace oil, sunflower oil, corn oil, soy oil, other oils, butter and lard, margarine, condensed milk, cream, croquettes and packet soup or creamy soup, mustard, mayonnaise, tomato sauce, others</i>                                           |
| Potatoes                                                         | <i>Boiled or roast potatoes and French fries</i>                                                                                                                                                                                                         |
| Biscuits and pastries                                            | <i>Simple cookies, chocolate cookies, home-made bakery, industrial bakery, doughnuts, muffins.</i>                                                                                                                                                       |
| Sugar, sweets, chocolate and cocoa                               | <i>Fruits in syrup, sugar, jam and honey, chocolate and chocolates, cocoa powder</i>                                                                                                                                                                     |
| Sugary beverages and juices                                      | <i>Sugar-sweetened soft drinks, natural orange juice, natural other fruits juices and bottled fruit juices</i>                                                                                                                                           |
| Sugar-free beverages                                             | <i>Sugar-free beverages</i>                                                                                                                                                                                                                              |
| Coffee and tea                                                   | <i>Coffee, decaffeinated coffee, tea</i>                                                                                                                                                                                                                 |
| Cava and beers                                                   | <i>Cava, beers</i>                                                                                                                                                                                                                                       |
| Spirits beverages                                                | <i>Liqueurs, anis and anisette, whiskey, gin, vodka</i>                                                                                                                                                                                                  |
| Wines                                                            | <i>Musts, rosé wine, muscatel wine, young red wine, old red wine, white wine</i>                                                                                                                                                                         |

**Table S2. Relationship (multivariable adjusted  $\beta$ -coefficients and 95%CI) between CSI and food groups consumption**

|                                                                        | $\beta$ | [95% CI]        | <i>p</i> -value |
|------------------------------------------------------------------------|---------|-----------------|-----------------|
| Full-fat dairy (g/d)                                                   | -6.67   | [-16.51;3.18]   | 0.184           |
| Low-fat dairy (g/d)                                                    | -12.39  | [-30.69;5.92]   | 0.185           |
| White meat (g/d)                                                       | 0.17    | [-3.22;3.57]    | 0.920           |
| Red meat and meat products (g/d)                                       | -3.17   | [-7.32;0.99]    | 0.135           |
| Eggs (g/d)                                                             | 1.63    | [-0.61;3.87]    | 0.230           |
| Fish and seafood (g/d)                                                 | 0.54    | [-4.11;5.18]    | 0.821           |
| Whole grain cereals (g/d)                                              | 1.97    | [-3.72;7.67]    | 0.497           |
| Refined cereals (g/d)                                                  | 11.98   | [5.24;18.72]    | 0.001           |
| Legumes (g/d)                                                          | 0.66    | [-0.4;1.72]     | 0.224           |
| Fruits (g/d)                                                           | -17.52  | [-33.89; -1.14] | 0.036           |
| Vegetables (g/d)                                                       | 0.88    | [-12.23;13.99]  | 0.895           |
| Nuts (g/d)                                                             | -0.18   | [-1.62;1.27]    | 0.811           |
| Olive oil and olives (g/d)                                             | -0.21   | [-2.21; 1.78]   | 0.834           |
| Other fat or oils, full-fat dairy derivatives and processed meal (g/d) | -0.06   | [-1.11;1]       | 0.918           |
| Potatoes (g/d)                                                         | 6.68    | [2.76;10.61]    | 0.001           |
| Biscuits and pastries (g/d)                                            | 0.66    | [-0.4;1.72]     | 0.154           |
| Sugar, sweets, chocolate and cocoa (g/d)                               | 0.21    | [-1.56;1.99]    | 0.814           |
| Sugary beverages and juices (g/d)                                      | -5.2    | [-16.63;6.23]   | 0.373           |
| Sugar-free beverages (g/d)                                             | -10.46  | [-21.87;0.95]   | 0.072           |
| Coffee and tea (g/d)                                                   | -8.03   | [-14.34; -1.72] | 0.013           |
| Cava and beers (g/d)                                                   | 1.73    | [-15.46;18.92]  | 0.844           |
| Spirits beverages (g/d)                                                | 0.15    | [-0.93;1.22]    | 0.789           |
| Wines (g/d)                                                            | -5.00   | [-12.75;2.75]   | 0.206           |

Multiple linear regressions. Beta-coefficient and [95% CI] are shown. CSI (low/high deprivation index) as exposure and food consumption (food groups, g/d) as outcome, adjusted by age (years), sex (men/women), smoking (smoker, former or never smoked), waist circumference (cm), physical activity (low/high), sedentary lifestyle (no/yes), hypertension (no/yes), dyslipidemia (no/yes) and type 2 diabetes mellitus.

**Table S3. Dietary patterns and food groups**

|                                                                           | Healthy pattern<br>n=704 | Unhealthy pattern<br>n=808 | p-value <sup>#</sup> |
|---------------------------------------------------------------------------|--------------------------|----------------------------|----------------------|
| Full-fat dairy (g/d)                                                      | 51.1 [29.9;87.0]         | 75.2 [42.6;136]            | <0.001               |
| Low-fat dairy (g/d)                                                       | 241 [139;336]            | 196 [49.2;263]             | <0.001               |
| White meat (g/d)                                                          | 74.8 [62.9;86.6]         | 64.8 [32.1;76.1]           | <0.001               |
| Red meat and meat products (g/d)                                          | 84.8 [61.6;113]          | 92.5 [69.9;122]            | <0.001               |
| Eggs (g/d)                                                                | 25.2 [22.3;26.6]         | 25.0 [21.7;26.8]           | 0.823                |
| Fish and seafood (g/d)                                                    | 131 [100;162]            | 88.4 [62.6;117]            | <0.001               |
| Whole grain cereals (g/d)                                                 | 59.3 [2.43;83.2]         | 0.72 [0.00;21.5]           | <0.001               |
| Refined cereals (g/d)                                                     | 69.2 [36.1;107]          | 133 [96.4;191]             | <0.001               |
| Legumes (g/d)                                                             | 20.2 [14.4;26.5]         | 15.9 [12.4;21.5]           | <0.001               |
| Fruits (g/d)                                                              | 357 [277;486]            | 241 [160;322]              | <0.001               |
| Vegetables (g/d)                                                          | 369 [297;468]            | 257 [202;321]              | <0.001               |
| Nuts (g/d)                                                                | 14.2 [6.03;28.9]         | 6.50 [2.93;12.9]           | <0.001               |
| Olive oil and olives (g/d)                                                | 57.7 [47.6;67.7]         | 54.5 [43.4;65.4]           | <0.001               |
| Other fat or oils, full-fat dairy derivatives<br>and processed meal (g/d) | 5.03 [2.32;9.43]         | 8.03 [3.96;14.1]           | <0.001               |
| Potatoes (g/d)                                                            | 89.5 [41.0;100]          | 92.8 [49.7;106]            | <0.001               |
| Biscuits and pastries (g/d)                                               | 12.5 [4.89;21.2]         | 17.4 [7.74;32.4]           | <0.001               |
| Sugar, sweets, chocolate and cocoa (g/d)                                  | 12.2 [5.08;21.8]         | 17.7 [7.59;30.9]           | <0.001               |
| Sugary beverages and juices (g/d)                                         | 34.7 [9.07;106]          | 40.0 [10.5;119]            | 0.229                |
| Sugar-free beverages (g/d)                                                | 1.34 [0.00;13.4]         | 1.60 [0.00;12.7]           | 0.520                |
| Coffee and tea (g/d)                                                      | 76.9 [48.4;127]          | 101 [49.6;128]             | 0.058                |
| Cava and beers (g/d)                                                      | 38.1 [3.89;78.9]         | 64.4 [21.0;155]            | <0.001               |
| Spirits beverages (g/d)                                                   | 0.77 [0.00;2.10]         | 1.50 [0.00;3.86]           | <0.001               |
| Wines (g/d)                                                               | 20.7 [3.44;51.2]         | 35.9 [9.09;96.5]           | <0.001               |
| Data are presented as median [IR].                                        |                          |                            |                      |
| p-value <sup>#</sup> : Mann–Whitney U test                                |                          |                            |                      |
